# Supplementary material for: WS2/g-C3N4 composite as an efficient heterojunction photocatalyst for biocatalyzed artificial photosynthesis
Source: Royal Society of Chemistry journal article supplement (doi:10.1039/c8ra02807a), 2018-01-01
Supplement: c8ra02807a1.pdf [file c8ra02807a1.pdf]

Electronic Supplementary Material (ESI) for RSC Advances.  
This journal is © The Royal Society of Chemistry 2018

**WS<sub>2</sub>/g-C<sub>3</sub>N<sub>4</sub> Composite as an Efficient Heterojunction Photocatalyst for  
Biocatalyzed Artificial Photosynthesis**

Peng Zeng<sup>a,b</sup>, Xiaoyuan Ji<sup>a,c</sup>, Zhiguo Su<sup>a</sup>, Songping Zhang<sup>a,\*</sup>

<sup>a</sup> State Key Laboratory of Biochemical Engineering, Institute of Process Engineering,  
Chinese Academy of Sciences, Beijing 100190, P.R. China

<sup>b</sup> University of Chinese Academy of Sciences, Beijing, 100049, P.R. China

<sup>c</sup> School of Pharmaceutical Sciences (Shenzhen), Sun Yat-sen University, Guangzhou  
510275, P.R. China

\* Corresponding author at:

State Key Laboratory of Biochemical Engineering, Institute of Process Engineering,  
Chinese Academy of Sciences, Beijing 100190, China

Tel: +86 10 82544958; fax: +86 10 82544958

E-mail: spzhang@ipe.ac.cn

## **1. Synthesis process of various composite samples**

### 1.1 Synthesis of sample 1:

100 mg of g-C<sub>3</sub>N<sub>4</sub> and 5 mg of WS<sub>2</sub> were added in 100 mL of water and then ultrasonically dispersed for 1.5 hours, and finally evaporated the solvent, sample 1 were obtained.

### 1.2 Synthesis of sample 2:

100 mg of g-C<sub>3</sub>N<sub>4</sub> and 5 mg of WS<sub>2</sub> were added in 100 mL of water, and then the mixture was sealed into a 100 mL Teflon-lined stainless steel autoclave and heated to 140 °C for 6 h. After cooling down to room temperature then evaporating the solvent, sample 2 were obtained.

### 1.3 Synthesis of sample 3:

100 mg of g-C<sub>3</sub>N<sub>4</sub> and 5 mg of WS<sub>2</sub> were added in 100 mL of water, and then ultrasonically dispersed for 1.5 hours, then the dispersion was sealed into a 100 mL Teflon-lined stainless steel autoclave and heated to 140 °C for 6 h. After cooling down to room temperature then evaporating the solvent, sample 3 were obtained.

### 1.4 Synthesis of sample 4:

The synthesis method is the same as sample 1.3, the only difference being that the hydrothermal time is changed to 2 hours.

### 1.5 Synthesis of sample 5:

The synthesis method is the same as sample 1.3, the only difference being that the hydrothermal temperature is changed to 120°C.

## **2. Detection of reactive species**

The procedures of the scavenging experiments of reactive oxygen species were similar to that of the photodegradation experiment. Various scavengers were subjected into the RhB solution prior to addition of photocatalyst, and the concentration of scavengers was the same at 1 mM. In this study, isopropyl alcohol (IPA), triethanolamine (TEOA) and nitrogen are used as scavengers of the hydroxyl radical, hole, and the superoxide radical, respectively; and KI acts as a scavenger of both hydroxyl radicals and holes.

## **3. Additional characterization**

Raman measurement was carried out on a LabRAM HR800 Raman system using an excitation source of 532 nm laser.

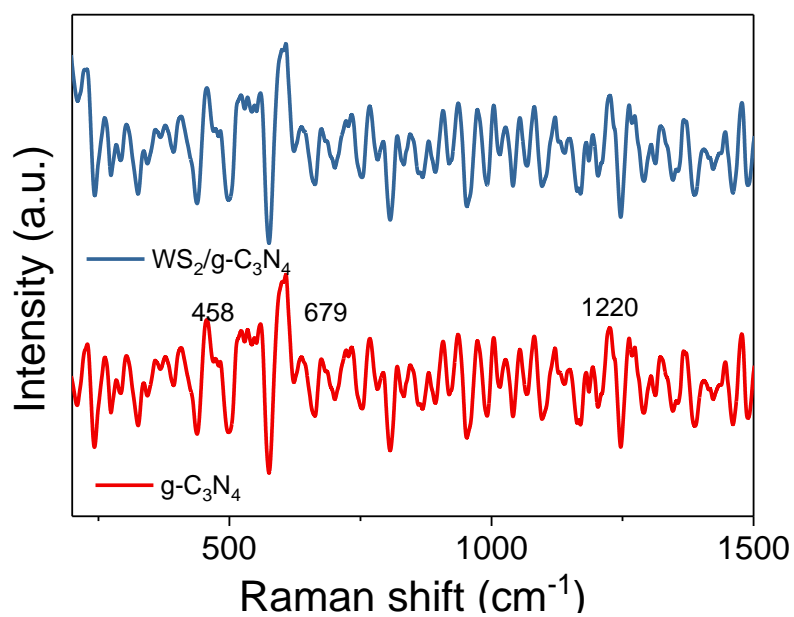

Figure S1. Raman spectra of g-C<sub>3</sub>N<sub>4</sub> and 5 wt% WS<sub>2</sub>/g-C<sub>3</sub>N<sub>4</sub> composite.

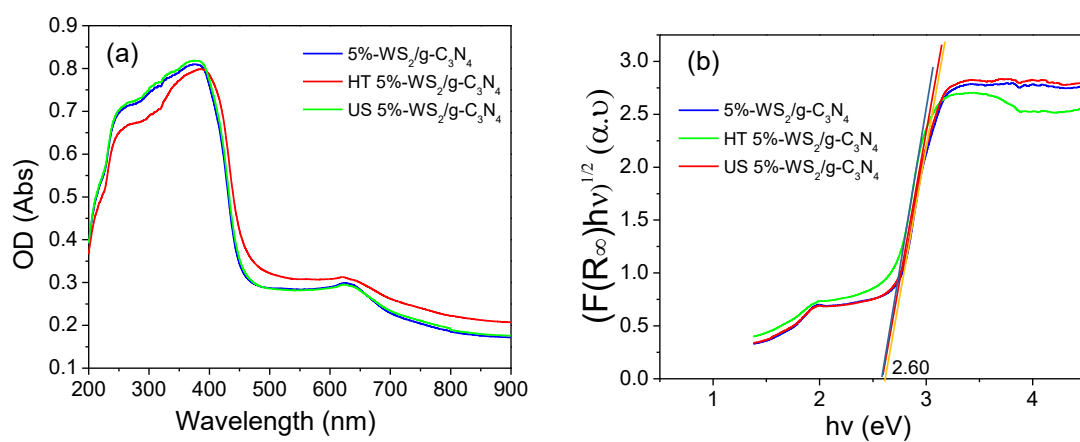

Figure S2. UV-vis absorption spectra (a) in the diffuse reflectance spectra mode of the composite with different preparation methods and (b) the corresponding bandgap estimated from Kubelka-Munk equation.

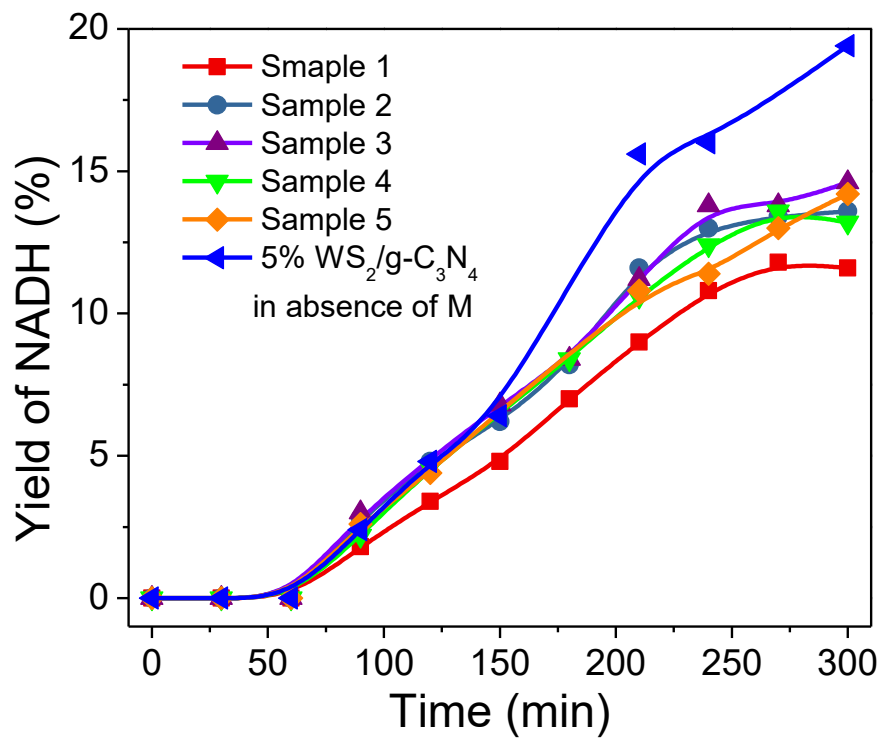

Figure S3. Photocatalytic NADH regeneration catalyzed by different composite samples. Detailed preparation conditions for each sample was summarized in Table S3.

Table S1. peak data of XPS spectra of g-C<sub>3</sub>N<sub>4</sub>, WS<sub>2</sub> and 5 wt% WS<sub>2</sub>/g-C<sub>3</sub>N<sub>4</sub> composite.

| Catalyst                                         | C 1s(eV)     | N 1s(eV)                      | S 2p(eV)     | W4f(eV)          |
|--------------------------------------------------|--------------|-------------------------------|--------------|------------------|
| g-C <sub>3</sub> N <sub>4</sub>                  | 284.4, 288.0 | 398.4, 399.0,<br>400.5, 404.4 | -            | -                |
| WS <sub>2</sub>                                  | -            | -                             | 162.9, 164.1 | 33.3, 35.5, 38.9 |
| WS <sub>2</sub> /g-C <sub>3</sub> N <sub>4</sub> | 284.7, 288.2 | 398.7, 399.5,<br>401.0, 404.7 | 161.7, 163.0 | 32.1, 34.4, 37.6 |

Table S2. BET surface area, pore diameter and pore volume data of g-C<sub>3</sub>N<sub>4</sub>, 5 wt% WS<sub>2</sub>/g-C<sub>3</sub>N<sub>4</sub> composite and PM-WS<sub>2</sub>/C<sub>3</sub>N<sub>4</sub>.

| Sample                                              | BET Surface Area(m <sup>2</sup> /g) | Pore Diameter(nm) | Pore Volume(cm <sup>3</sup> /g) |
|-----------------------------------------------------|-------------------------------------|-------------------|---------------------------------|
| g-C <sub>3</sub> N <sub>4</sub>                     | 7.34                                | 28.15             | 0.05                            |
| 5%-WS <sub>2</sub> /g-C <sub>3</sub> N <sub>4</sub> | 12.22                               | 19.70             | 0.06                            |
| PM-WS <sub>2</sub> /C <sub>3</sub> N <sub>4</sub>   | 6.87                                | 23.50             | 0.04                            |

Table S3. Photocatalytic NADH regeneration by composites with different treated methods.

| Composite                                           | Synthetic Methods                                                                                                                     | Yield of NADH at 6 h |
|-----------------------------------------------------|---------------------------------------------------------------------------------------------------------------------------------------|----------------------|
| Sample 1                                            | Ultrasonication (1.5 h) without hydrothermal treatment                                                                                | 11.6%                |
| Sample 2                                            | Hydrothermal treatment (140°C, 6 h) without ultrasonication                                                                           | 13.6%                |
| Sample 3                                            | Ultrasonication (1.5 h) + Hydrothermal treatment (140°C, 6 h)                                                                         | 14.6%                |
| Sample 4                                            | Ultrasonication (1.5 h) + Hydrothermal treatment (140°C, 2 h)                                                                         | 13.2%                |
| Sample 5                                            | Ultrasonication (1.5 h) + Hydrothermal treatment (120°C, 6 h)                                                                         | 14.2%                |
| 5%-WS <sub>2</sub> /g-C <sub>3</sub> N <sub>4</sub> | Ultrasonication (1.5 h) + Mechanical stirring (36 h) + Hydrothermal treatment (140°C, 6 h)                                            | 37.1%                |
| 5%-WS <sub>2</sub> /g-C <sub>3</sub> N <sub>4</sub> | Ultrasonication (1.5 h) + Mechanical stirring (36 h) + Hydrothermal treatment (140°C, 6 h), photoregeneration of NADH in absence of M | 19.4%                |
